# Supplementary material for: Employing Gamma-Ray-Modified Carbon Quantum Dots to Combat a Wide Range of Bacteria
Source: MDPI journal article supplement (doi:10.3390/antibiotics12050919), 2023-05-17
Supplement: s1 [file s1]

Supporting information

Employing gamma rays modified carbon quantum dots to combat wide range of bacteria

Zoran M. Marković<sup>1</sup>, Aleksandra S. Mišović<sup>2</sup>, Danica Z. Zmejkoski<sup>1</sup>, Nemanja M. Zdravković<sup>2</sup>, Janez Kovač<sup>3</sup>, Danica V. Bajuk-Bogdanović<sup>4</sup>, Dušan D. Milivojević<sup>1</sup>, Marija M. Mojsin<sup>5</sup>, Milena J. Stevanović<sup>5,6,7</sup>, Vladimir B. Pavlović<sup>8</sup>, Biljana M. Todorović Marković<sup>1\*</sup>

<sup>1</sup>Vinča Institute of Nuclear Sciences, National Institute of the Republic of Serbia, University of Belgrade, Mike Alasa 12-14, 11001 Belgrade, Serbia

<sup>2</sup>Faculty of Physical Chemistry, University of Belgrade, Studentski trg 12-16, 11158 Belgrade, Serbia

<sup>3</sup>Scientific Veterinary Institute of Serbia, Janisa Janulisa 14, 11107 Belgrade, Serbia

<sup>4</sup>Jozef Stefan Institute, Department of Surface Engineering - F4, Jamova cesta 39, 1000Ljubljana, Slovenia

<sup>5</sup>Institute of Molecular Genetics and Genetic Engineering, University of Belgrade, Vojvode Stepe 444a, 11042 Belgrade, Serbia

<sup>6</sup>Faculty of Biology, University of Belgrade, Studentski trg 16, 11000 Belgrade, Serbia

<sup>7</sup>Serbian Academy of Sciences and Arts, Knez Mihailova 35, 11000 Belgrade, Serbia

<sup>8</sup>Faculty of Agriculture, University of Belgrade, Nemanjina 6, 11080 Belgrade-Zemun, Serbia

\*corresponding author. email: biljatod@vin.bg.ac.rs

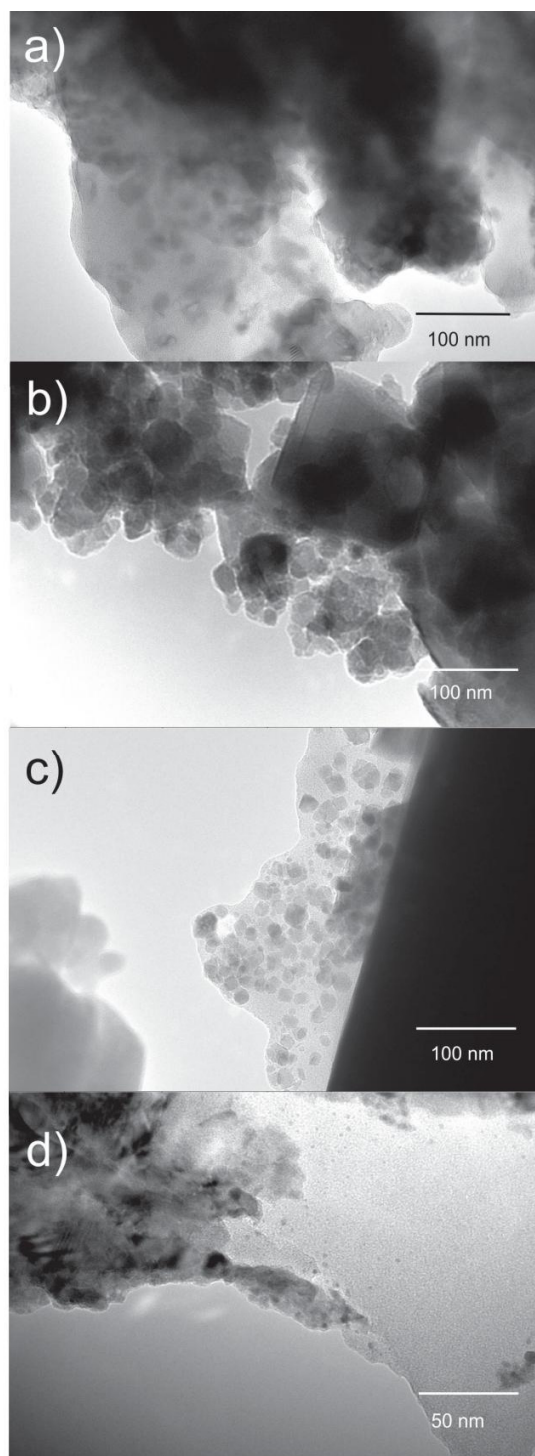

**Figure S1.** TEM micrographs a) CQD\_25, b) CQD\_50, c) CQD\_100, and d) CQD\_200 samples, respectively.

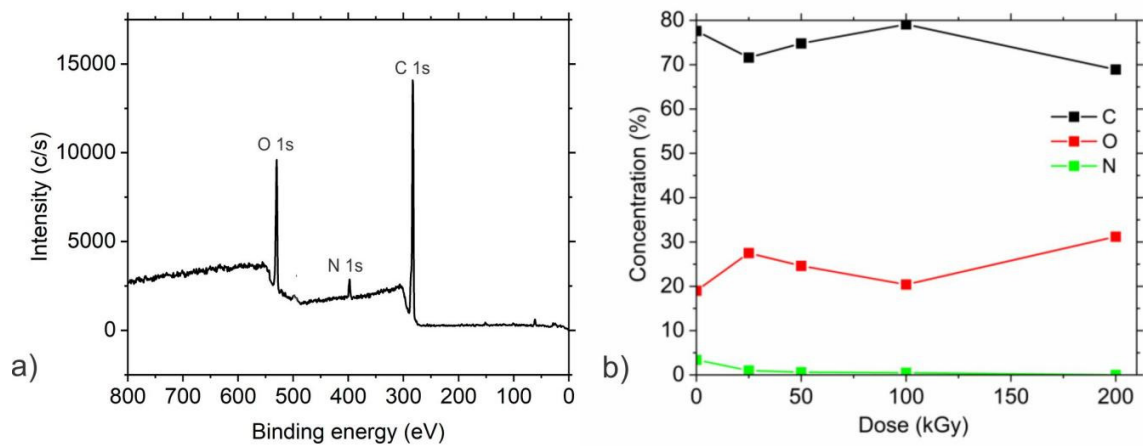

**Figure S2.** a) A typical survey XPS spectrum from CQDs\_0 sample, b) Surface composition in at.% measured from the XPS spectra after gamma rays irradiation at different doses.

**Table S1.** The content in at.% of characteristic bonds identified in all investigated samples.

| Dose (kGy) | C1 in C 1s | C2 in C1s | C3 in C1s | C4 in C1s | O1 in O 1s | O2 in O 1s |
|------------|------------|-----------|-----------|-----------|------------|------------|
| 0          | 77         | 12        | 10        | 2         | 66         | 34         |
| 25         | 73         | 11        | 14        | 3         | 59         | 41         |
| 50         | 76         | 10        | 12        | 2         | 63         | 37         |
| 100        | 85         | 4         | 10        | 1         | 86         | 14         |
| 200        | 70         | 5         | 26        | 0         | 100        | 0          |

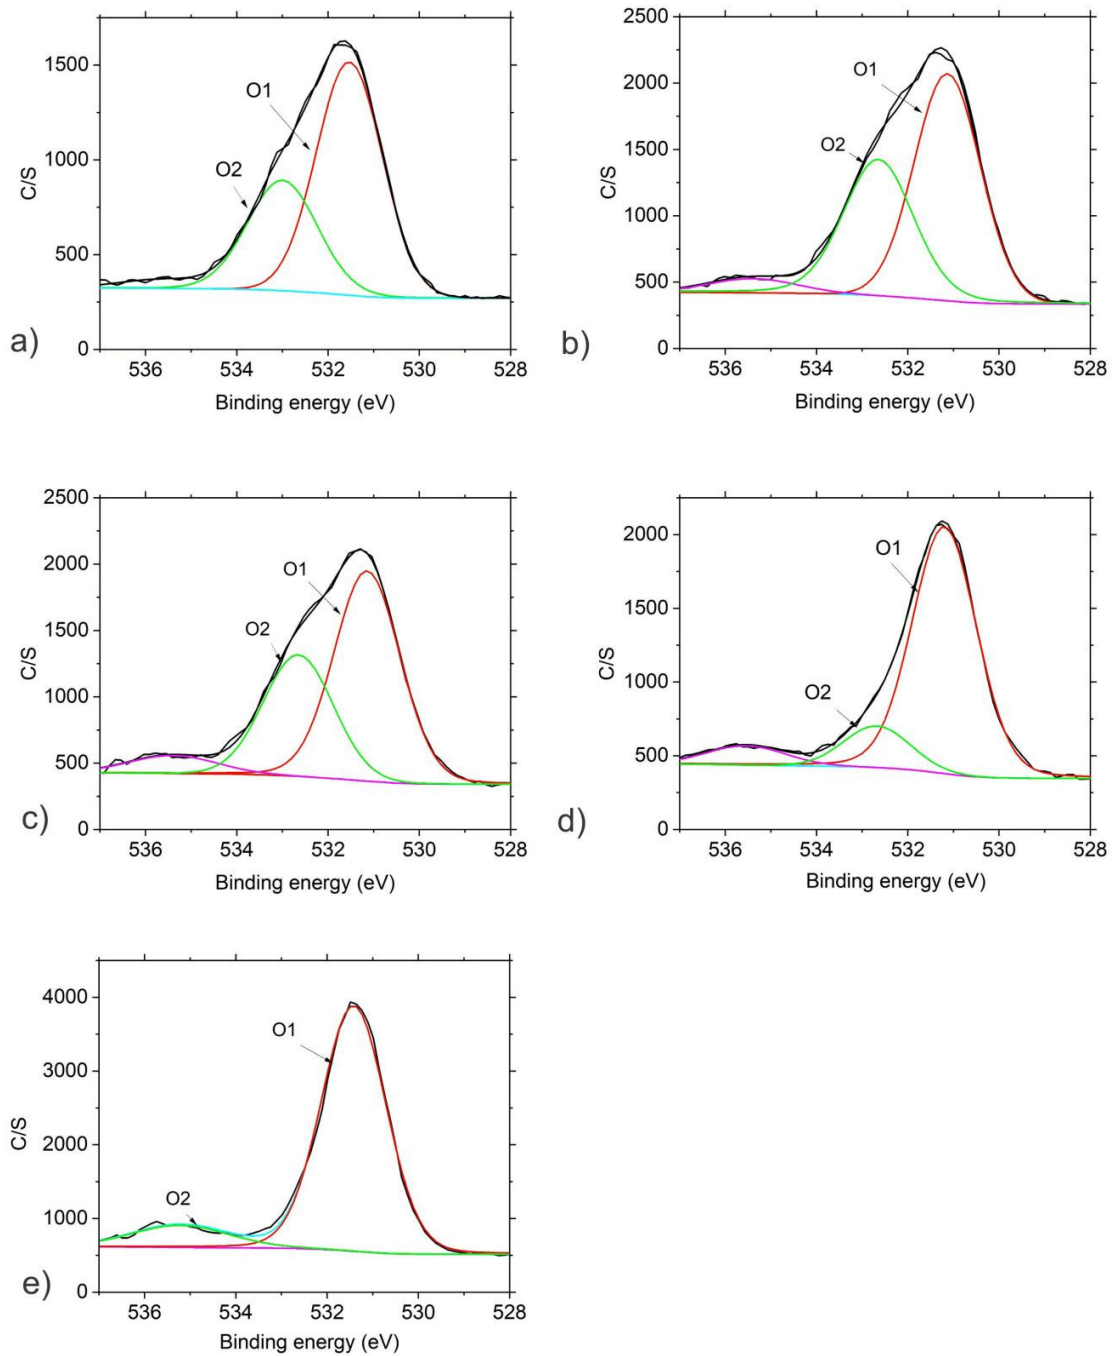

**Figure S3.** Fitted XPS O1s spectra of a) CQDs\_0, b) CQDs\_25, c) CQDs\_50, d) CQDs\_100, e) CQDs\_200 samples, respectively.

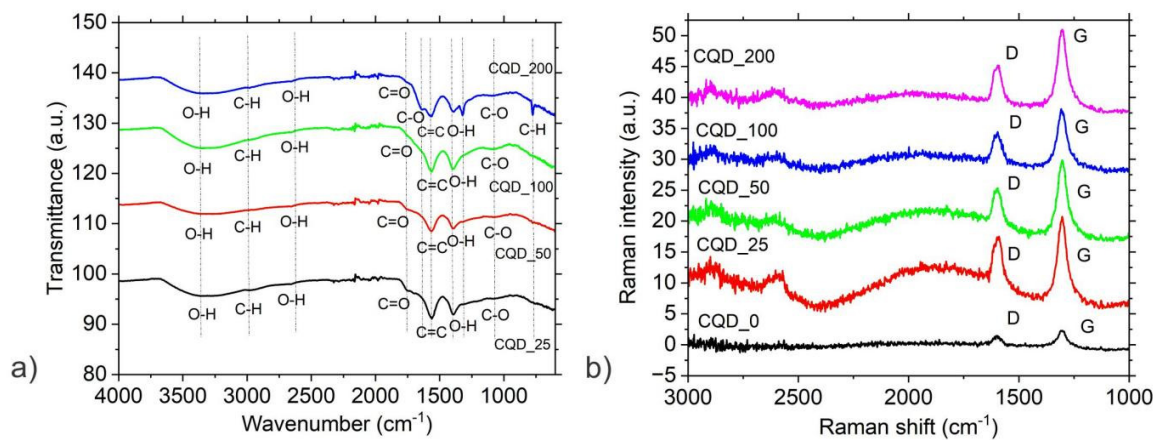

**Figure S4.** a) FTIR spectra of CQD\_25, CQD\_50, CQD\_100, CQD\_200, respectively, b) Raman spectra of CQD\_0, CQD\_25, CQD\_50, CQD\_100, CQD\_200, respectively. All spectra are displaced due to clarity.

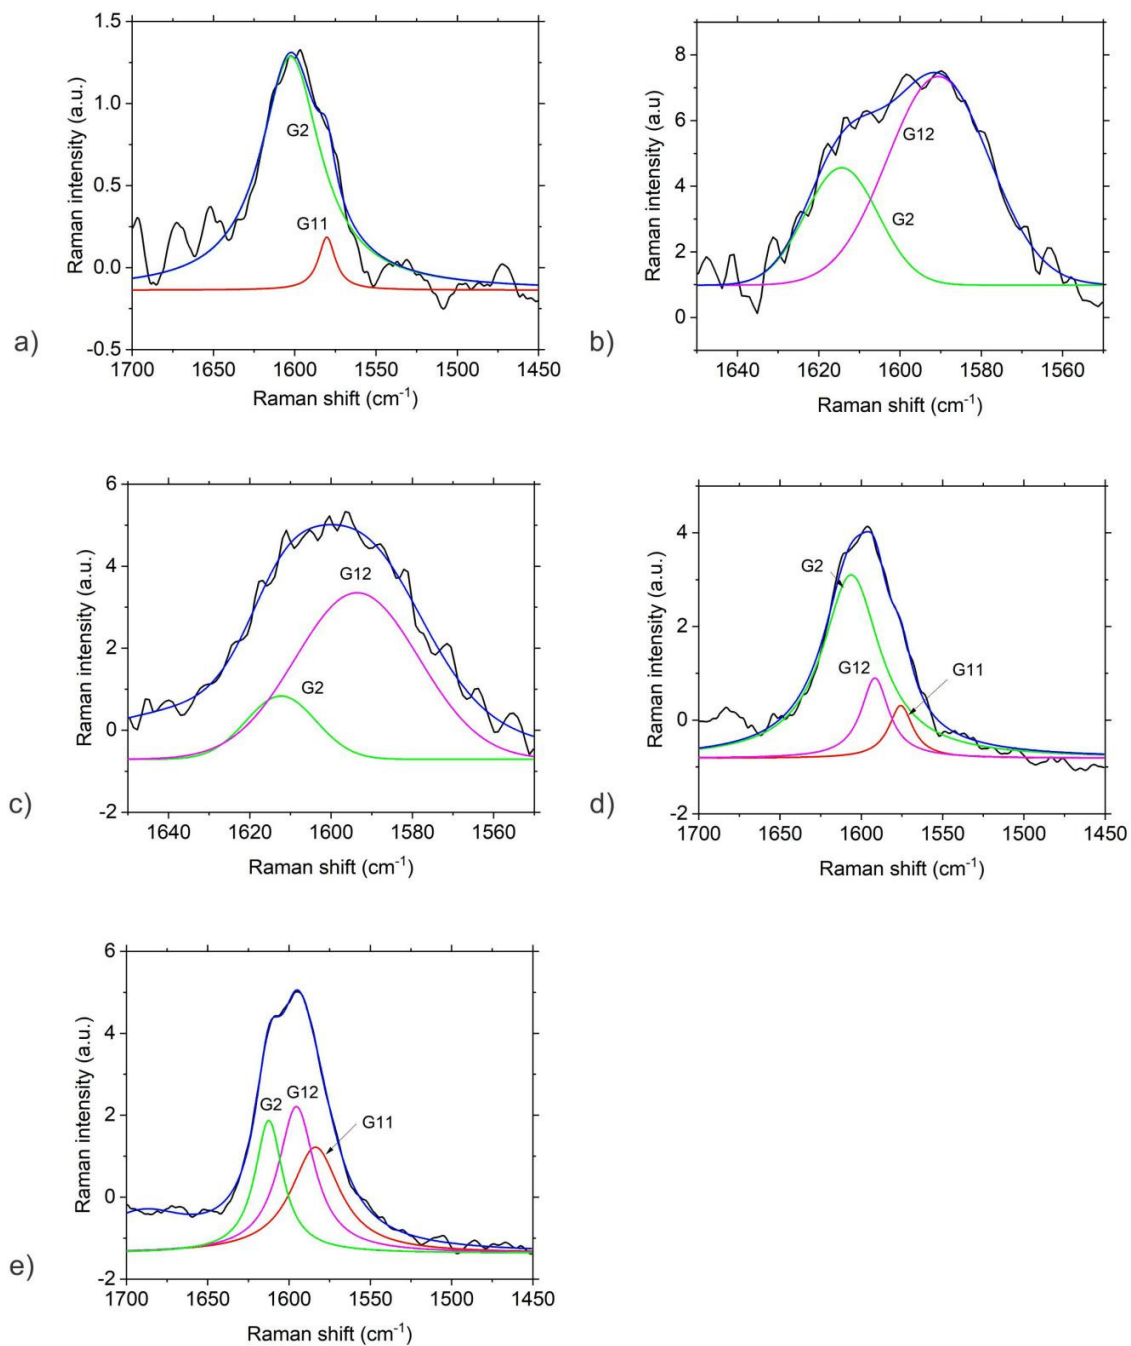

**Figure S5.** Fitted Raman spectra of a) CQD\_0, b) CQD\_25, c) CQD\_50, d) CQD\_100 and e) CQD\_200. The G peaks of the samples were fitted by three Lorentzian peaks (1580, 1590 and 1610 cm<sup>-1</sup>) which are denoted as G11, G12 and G2, respectively.

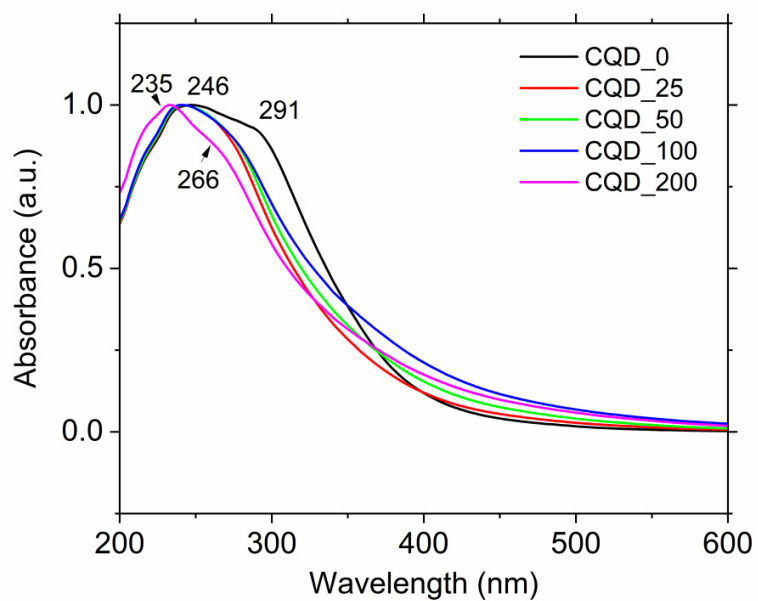

**Figure S6.** UV-Vis spectra of CQD\_0 (black curve), CQD\_25 (red curve), CQD\_50 (green curve), CQD\_100 (blue curve) and CQD\_200 (magenta curve) samples, respectively.

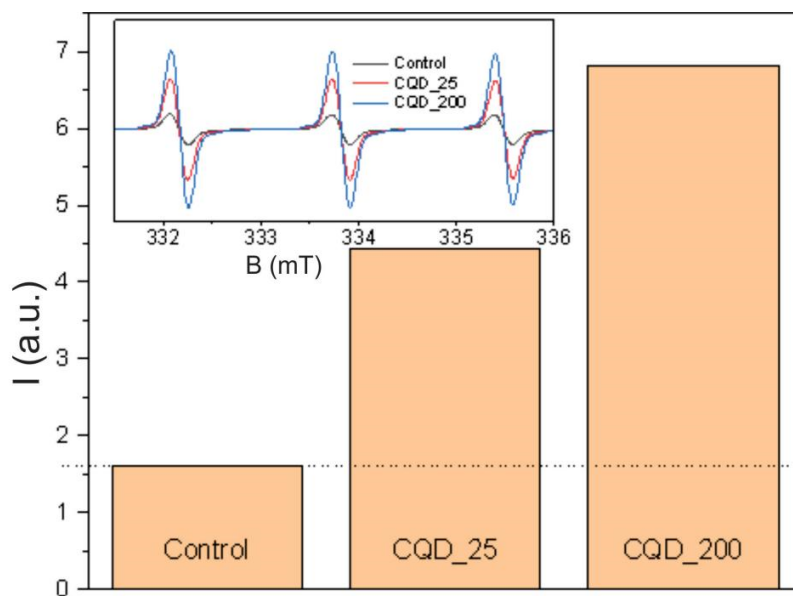

**Figure S7.** EPR intensity of singlet oxygen production by CQD\_25 and CQD\_200 samples compared to control.
